# Supplementary material for: A dually emissive MPA-CdTe QDs@N, S-GQD nanosensor for sensitive and selective detection of 4-nitrophenol using two turn-off signals
Source: Royal Society of Chemistry journal article supplement (doi:10.1039/d3ay01160g), 2023-01-01
Supplement: d3ay01160g1.pdf [file d3ay01160g1.pdf]

## Supplementary Information

### **A dually emissive MPA-CdTe QDs@N, S-GQDs nanosensor for sensitive and selective detection of 4-Nitrophenole by two-turn-off signals**

Zahra Mamipour<sup>1,3</sup>, Mohsen Kompany-Zareh<sup>1,2\*</sup>, Ali Nematollahzadeh<sup>3</sup>

1. Department of Chemistry, Institute for Advanced Studies in Basic Sciences (IASBS), Zanjan 45137-66731, Iran.

2. Department of Chemistry, Dalhousie University, PO Box 15000, Halifax, Nova Scotia, B3H 4R2, Canada.

3. Chemical Engineering Department, University of Mohaghegh Ardabili, P.O. Box 179, Ardabil, Iran.

\*Corresponding author:

E-mail address: mohsenkompany@dal.ca

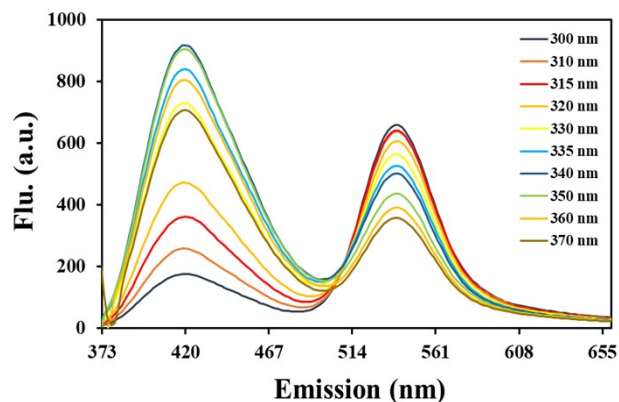

**Figure S1** Fluorescence emission spectra of CdTe QDs @N, S-GQDs nanosensor at different excitation wavelengths.

As depicted in Fig. S2, the fluorescence intensity of both quantum dots rises as the pH level increases. The fluorescence intensity of N, S-GQDs (S2a) is almost stable when the pH is above 4. However, CdTe QDs (S2b) exhibit the strongest fluorescence between pH 5 ~ 6.5, after which the fluorescence intensity decreases with further increases in pH.

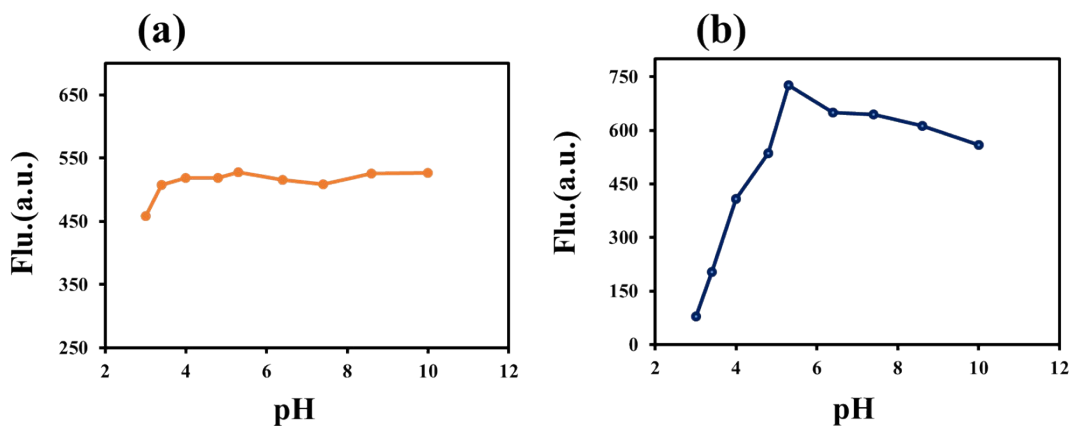

**Figure S2** Fluorescence emission spectra of N, S-GQDs (S2a) and CdTe QDs (S2b) at different pH values (3.0, 3.4, 4.0, 4.8, 5.3, 6.4, 7.4, 8.6, 10).

As it is shown in Fig. S3(a) when the added volume of the sensor is changed by mistake or uncertainty (yellow cell), the related calibration curve of single QDs and GQDs fluorescence signal

is changed (Fig. S3c). However, the calibration curve for the ratio of the fluorescence signals (Fig. S3d) remains unchanged. It shows clearly the advantage of using the ratio plot.

The point is that when both the slopes of signal changes are high (similar high values of -0.050 and -0.048 in green and blue cells) the slope of the ratio plot is low (Fig. S4c, d). It would be preferable to have different values for these two slopes. It means a high slope for one (e.g., -0.05) and a low slope for the other (e.g., -0.01).

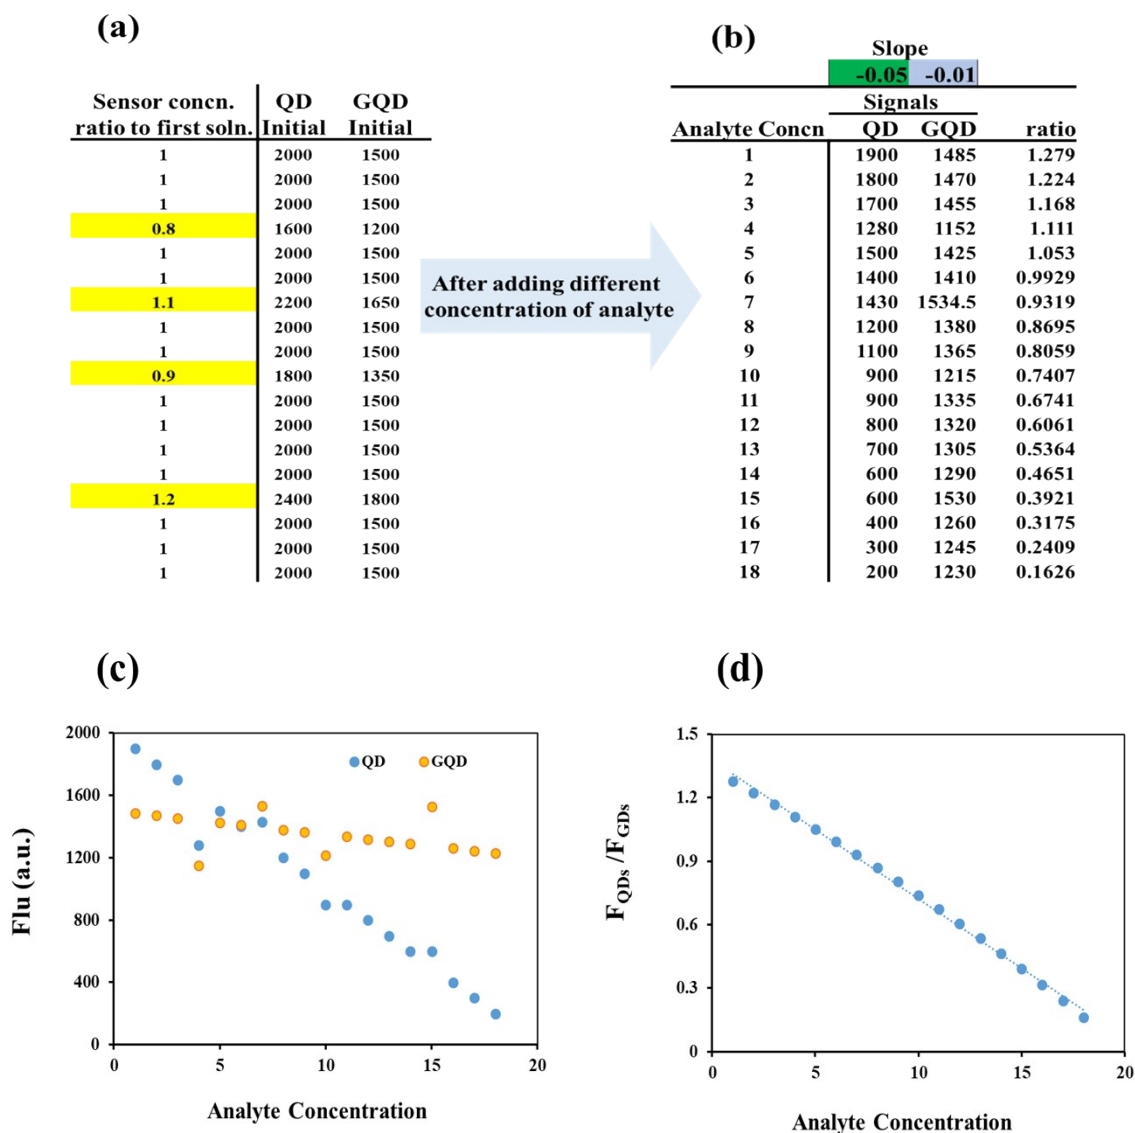

**Figure S3.** (a, b) simulated data, (c) calibration curve for single QDs and GQDs fluorescence signal (d) calibration curve for ratio of fluorescence signal ( $F_{QDs}/F_{GQDs}$ ).

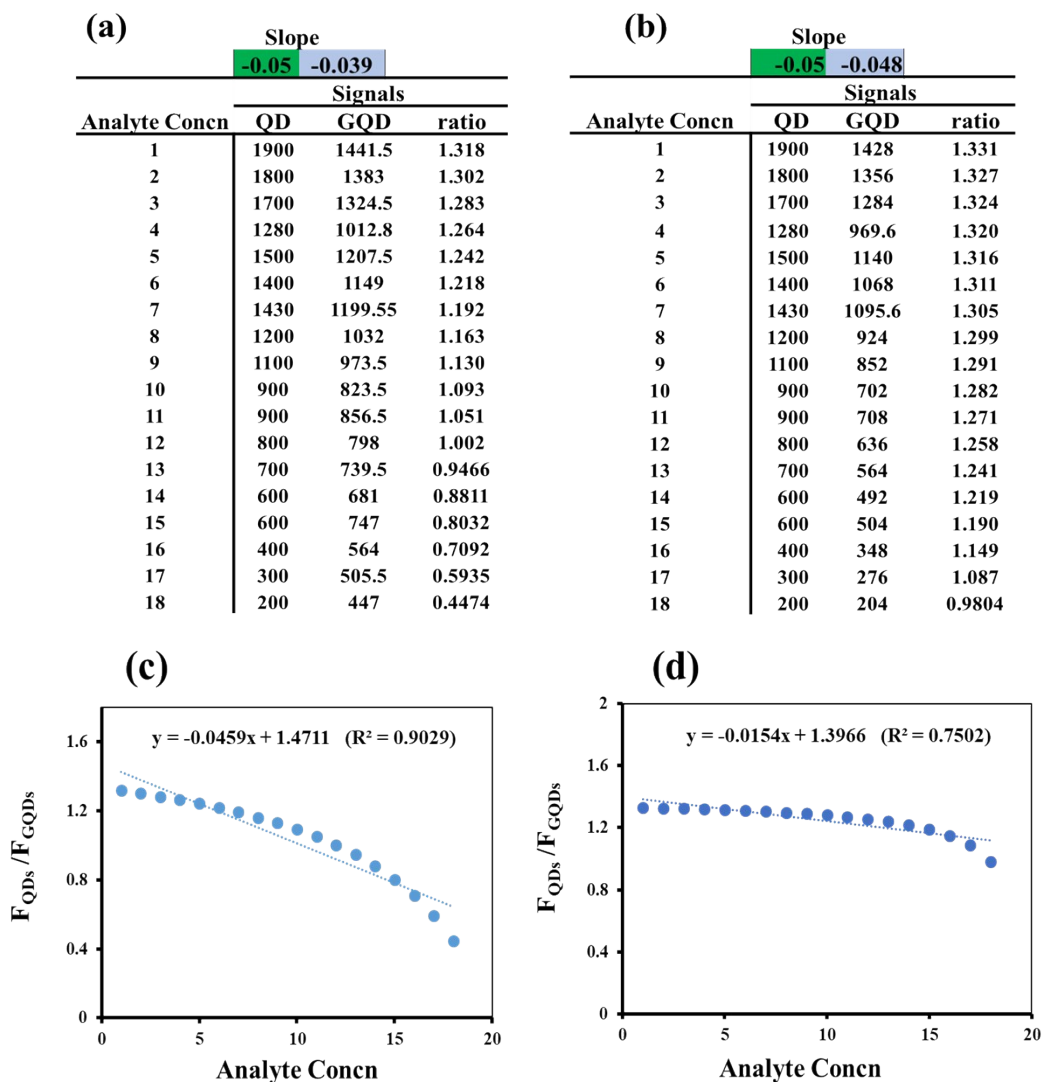

**Figure S4.** (a, b) The simulated data (Fig. S3 b) with different slope values (-0.039 and -0.048) for GQDs and (a, b) Corresponding calibration curve for the  $F_{QDs}/F_{GQDs}$  (c, d).
